# Supplementary material for: Photostable 3D heterojunction photoanode made of ZnO nanosheets coated onto TiO2 nanowire arrays for photoelectrochemical solar hydrogen generation
Source: Royal Society of Chemistry journal article supplement (doi:10.1039/c9cy00119k), 2019-01-01
Supplement: c9cy00119k1.pdf [file c9cy00119k1.pdf]

## Electronic supplementary information

### Photostable 3D heterojunction photoanode of ZnO nanosheets coated onto TiO<sub>2</sub> nanowire arrays for photoelectrochemical solar hydrogen generation

Hongsong Han,<sup>a</sup> Wenzhong Wang,<sup>\*a</sup> Lizhen Yao,<sup>a</sup> Chenchun Hao,<sup>b</sup> Yujie Liang,<sup>a</sup>

Junli Fu<sup>a</sup> and Pengbo Zeng<sup>a</sup>

<sup>a</sup> *School of Science, Minzu University of China, Beijing, 100081, China*

<sup>b</sup> *State Key Laboratory of Information Photonics and Optical Communications &  
School of Science, Beijing University of Posts and Telecommunications, Beijing  
100876, China*

\*Corresponding author: [wzhwang@muc.edu.cn](mailto:wzhwang@muc.edu.cn)

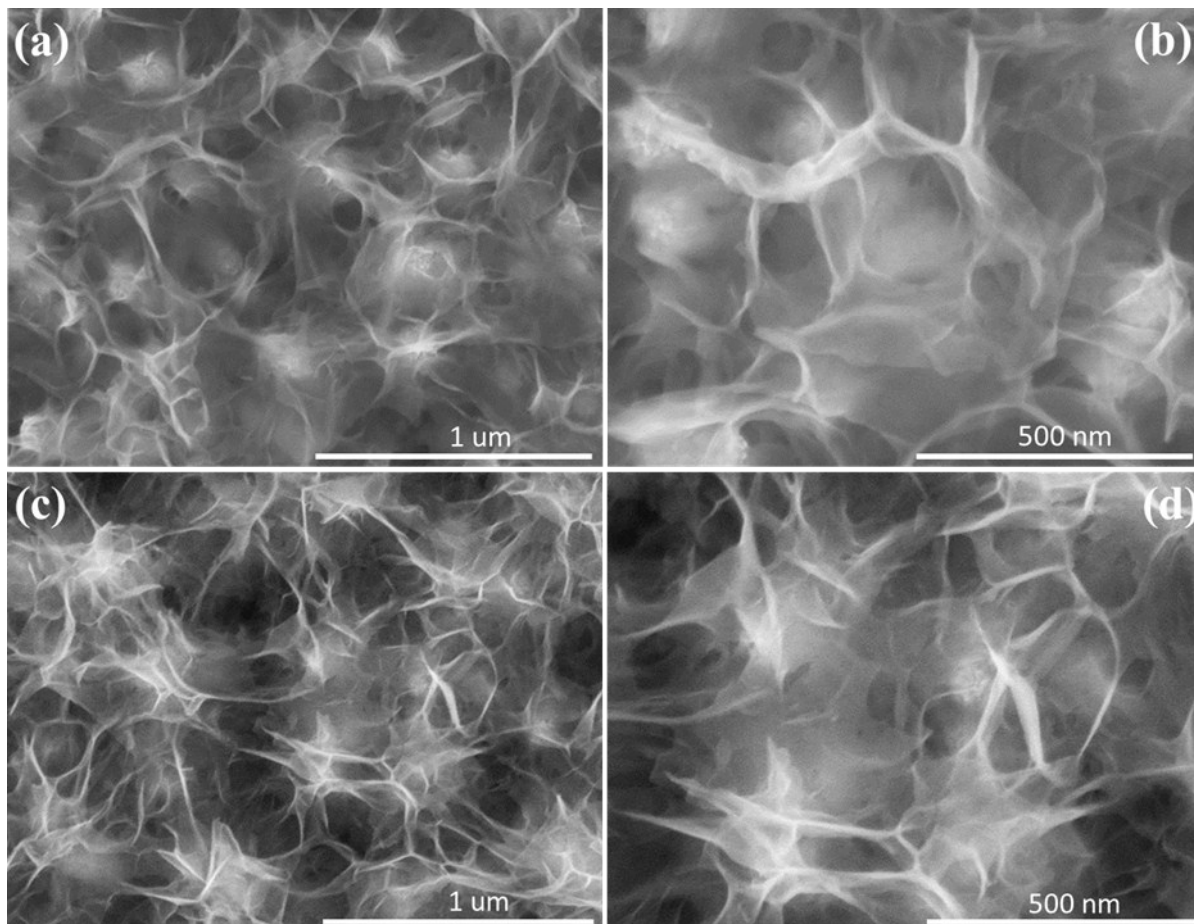

**Fig. S1** (a) and (b) Medium- and high-magnification SEM images of 3D ZnO/TiO<sub>2</sub> 2D/1D NSs-NWAs architectures fabricated in 0.1 M zinc nitrate aqueous solution, showing that some tops of 1D TiO<sub>2</sub> NWAs are not covered by hierarchical 2D ZnO NSs. (c) and (d) Medium- and high-magnification SEM images of ZnO/TiO<sub>2</sub> NSs-NWAs architectures fabricated in 0.15 M zinc nitrate aqueous solution, showing that some tops of 1D TiO<sub>2</sub> NWAs are completely covered by hierarchical 3D architectures assembled by 2D ZnO NSs.

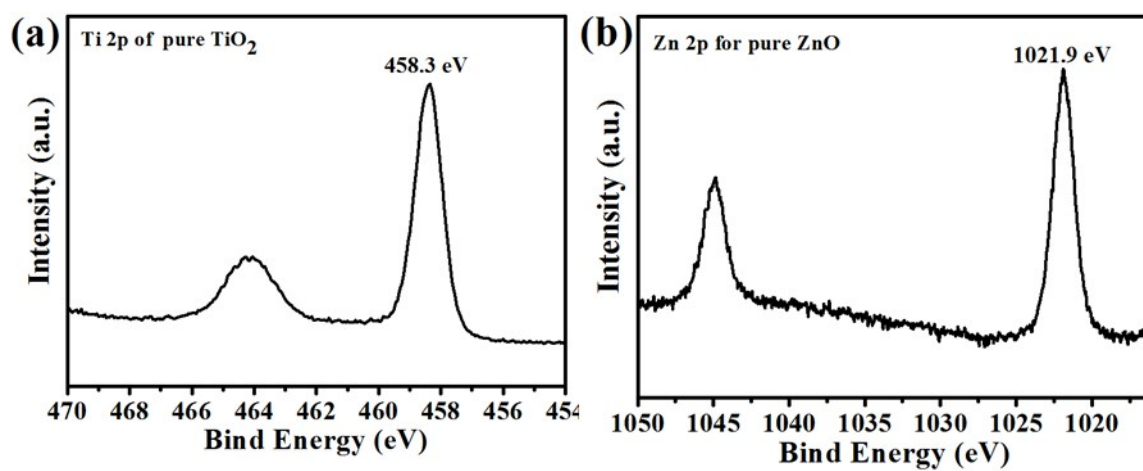

**Fig. S2** High-resolution core-level XPS spectra for (a) Ti 2p of pure TiO<sub>2</sub> and (b) Zn 2p of pure ZnO.

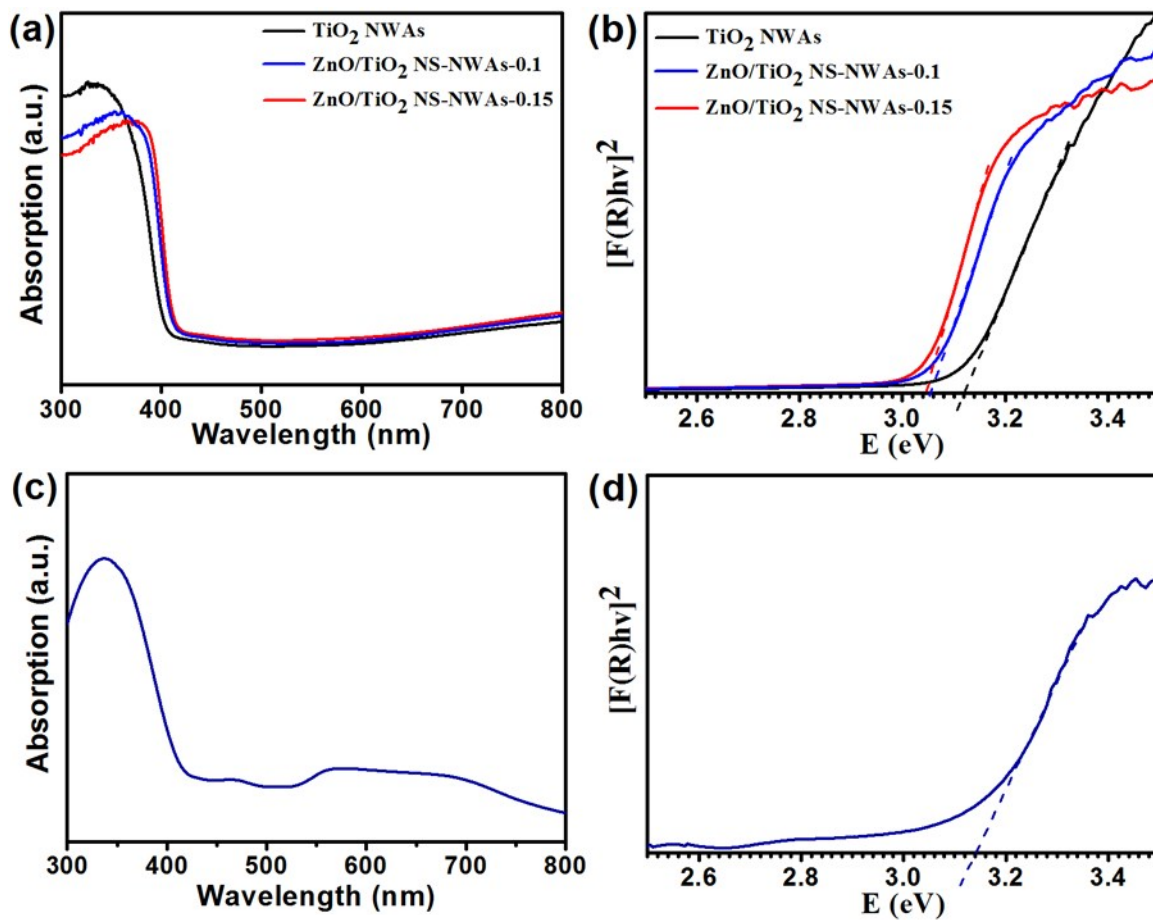

**Fig. S3** (a) UV-vis absorption spectra of pure 1D TiO<sub>2</sub> NWAs, ZnO/TiO<sub>2</sub> NS-NWAs-0.1 and ZnO/TiO<sub>2</sub> NS-NWAs-0.15 samples. (b) Band gap energies of pure TiO<sub>2</sub> NWAs, ZnO/TiO<sub>2</sub> NS-NWAs-0.1 and ZnO/TiO<sub>2</sub> NS-NWAs-0.15 samples. (c) UV-vis absorption spectrum of pure 2D ZnO NSs. (d) Band gap energy of pure 2D ZnO NSs.
